# Supplementary material
Source: publisher figshare collection journal article supplement (https://sage.figshare.com/ndownloader/files/17428379)
Supplement: Supplementary file 1 [file 17428379]

## Supplemental File 4: Parent Perspectives on Communicating about Epilepsy

| I usually talk to my child about his/her epilepsy when...               | N  | Really true for me | Sort of true for me | Not at all true for me | Does not apply, I never talk to my child about his/her epilepsy  |
|-------------------------------------------------------------------------|----|--------------------|---------------------|------------------------|------------------------------------------------------------------|
| My child has a seizure                                                  | 71 | 70.4%              | 21.1%               | 8.5%                   | 0%                                                               |
| My child takes his/her medication                                       | 70 | 38.6%              | 40%                 | 21.4%                  | 0%                                                               |
| My child asks me questions                                              | 72 | 76.4%              | 19.4%               | 4.2%                   | 0%                                                               |
| My child has a hospital appointment coming up/has recently had one      | 71 | 76.1%              | 19.7%               | 4.2%                   | 0%                                                               |
| My child's medication is causing difficulties                           | 72 | 58.3%              | 16.7%               | 25%                    | 0%                                                               |
| My child cannot partake in an activity due to his/her epilepsy          | 72 | 44.4%              | 22.2%               | 30.6%                  | 2.8%                                                             |
| My child is worried/upset                                               | 72 | 62.5%              | 27.8%               | 9.7%                   | 0%                                                               |
| My child needs support                                                  | 72 | 70.8%              | 22.2%               | 6.9%                   | 0%                                                               |
| When I talk to my child about his/her epilepsy, we talk about...        | N  | Really true for me | Sort of true for me | Not at all true for me | Does not apply, I never talk to my child about his/her epilepsy  |
| What epilepsy is                                                        | 72 | 68.1%              | 29.2%               | 2.8%                   | 0%                                                               |
| How my child feels about having epilepsy                                | 71 | 62%                | 35.2%               | 2.8%                   | 0%                                                               |
| What happens when my child has a seizure (e.g. – how he/she appears)    | 71 | 67.6%              | 25.4%               | 7%                     | 0%                                                               |
| My child's medication                                                   | 72 | 80.6%              | 16.7%               | 2.8%                   | 0%                                                               |
| Medication side effects                                                 | 72 | 48.6%              | 33.3%               | 18.1%                  | 0%                                                               |
| My child's hospital appointments                                        | 72 | 76.4%              | 18.1%               | 5.6%                   | 0%                                                               |
| Restrictions my child experiences due to his/her epilepsy               | 72 | 45.8%              | 30.6%               | 22.2%                  | 1.4%                                                             |
| My child's seizure control (or lack thereof)                            | 72 | 58.3%              | 25%                 | 15.3%                  | 1.4%                                                             |
| Whether my child will grow out of his/her epilepsy                      | 72 | 48.6%              | 34.7%               | 15.3%                  | 1.4%                                                             |
| I talk to my child about his/her epilepsy because...                    | N  | Really true for me | Sort of true for me | Not at all true for me | Does not apply, I never talk to my child about his/her epilepsy  |
| I don't want my child to feel different                                 | 72 | 84.7%              | 6.9%                | 8.3%                   | 0%                                                               |
| I want my child to know what he/she should do in the event of a seizure | 72 | 75%                | 22.2%               | 2.8%                   | 0%                                                               |
| It helps my child to deal with certain situations                       | 72 | 79.2%              | 16.7%               | 4.2%                   | 0%                                                               |
| It helps me to deal with certain situations                             | 72 | 65.3%              | 23.6%               | 11.1%                  | 0%                                                               |
| I want my child to be informed about his/her epilepsy                   | 72 | 88.9%              | 11.1%               | 0%                     | 0%                                                               |
| I don't want my child to keep secrets about his/her epilepsy            | 72 | 77.8%              | 19.4%               | 2.8%                   | 0%                                                               |
| I don't talk to my child about his/her epilepsy because...              | N  | Really true for me | Sort of true for me | Not at all true for me | Does not apply, I always talk to my child about his/her epilepsy |
| I don't want to single my child out in comparison to his/her siblings   | 69 | 15.7%              | 12.9%               | 34.3%                  | 37.1%                                                            |
| I don't want to worry my child                                          | 70 | 24.3%              | 14.3%               | 25.7%                  | 35.7%                                                            |
| I don't want my child to dwell on his/her epilepsy                      | 69 | 31.9%              | 13%                 | 23.2%                  | 31.9%                                                            |

| Do any of the following encourage or discourage you to talk to your child about his/her epilepsy? | N  | This encourages me | This discourages me | Does not apply, this has no impact on how much I talk to my child about his/her epilepsy |
|---------------------------------------------------------------------------------------------------|----|--------------------|---------------------|------------------------------------------------------------------------------------------|
| My child's disposition (i.e. – your child's temperament and nature)                               | 71 | 54.9%              | 19.7%               | 25.4%                                                                                    |
| The amount of time my child has had epilepsy                                                      | 70 | 51.4%              | 7.1%                | 41.4%                                                                                    |
| The level of information I have about my child's epilepsy                                         | 71 | 60.6%              | 11.3%               | 28.2%                                                                                    |
| My child's seizures are well controlled                                                           | 71 | 67.6%              | 7%                  | 25.4%                                                                                    |
| Portrayals of epilepsy in the media                                                               | 71 | 39.4%              | 16.9%               | 43.7%                                                                                    |
| Do any of the following encourage or discourage you to talk to your child about his/her epilepsy? | N  | This encourages me | This discourages me | Does not apply, this has no impact on how much I talk to my child about his/her epilepsy |
| My own attitudes towards epilepsy                                                                 | 71 | 62%                | 4.2%                | 33.8%                                                                                    |
| Experiences I had with epilepsy prior to my child's diagnosis                                     | 71 | 29.6%              | 12.7%               | 57.7%                                                                                    |
| Talking about epilepsy with my child makes me feel...                                             | N  | Yes                | No                  | Does not apply, I never talk to my child about his/her epilepsy                          |
| Reassured                                                                                         | 71 | 85.9%              | 14.1%               | 0%                                                                                       |
| Optimistic                                                                                        | 67 | 88.1%              | 11.9%               | 0%                                                                                       |
| Anxious                                                                                           | 67 | 32.8%              | 67.2%               | 0%                                                                                       |
| Uncomfortable                                                                                     | 68 | 10.3%              | 89.7%               | 0%                                                                                       |
| Pessimistic                                                                                       | 67 | 9%                 | 91%                 | 0%                                                                                       |
